# Supplementary material
Source: PubMed Central journal article supplement (PMC2783285)
Supplement: NIHMS142702-supplement-01.pdf [file NIHMS142702-supplement-01.pdf]

## Isotopomer Analysis

For a subset of the treatment groups (10 mM PA and untreated control) reaction fluxes were estimated using both metabolite uptake/output and isotopic label distribution data. Figure S1 summarizes the overall flux estimation scheme. The problem is initialized with a random flux distribution  $\mathbf{v}_0$  that satisfies the steady-state metabolite balance constraints:

$$\mathbf{S} \cdot \mathbf{v} = \mathbf{0} \quad (\text{S1})$$

where  $\mathbf{S}$  is the stoichiometric matrix and  $\mathbf{v}$  is the steady-state reaction flux vector. This initial flux estimate is then combined with the MID of the input substrate to initialize the corresponding steady-state mass isotopomer distribution (MID) of selected intracellular metabolites. In this study, the input substrate was [1,2- $^{13}\text{C}$ ]glucose at 100% enrichment. The metabolites selected for MID simulation were citrate (CIT) and malate (MAL). The inputs and target metabolites were selected based on preliminary simulations as described in the next section.

To reduce the number of isotopomer variables and equations for this simulation, we first performed an elementary metabolite unit (EMU) decomposition analysis as previously described in (Antoniewicz, et al., 2007). For brevity, we illustrate the EMU analysis for a portion of the adipocyte model around the TCA cycle. A schematic of this example sub-network is shown in Figure S2. Starting with the largest EMU of the target metabolite (in this case citrate) we record all of the EMU reactions that form the target EMU from EMUs of equivalent or smaller size. This process is repeated until the target EMU has been traced back to either the input substrate (in this case pyruvate) or EMUs formed by reactions that have already been recorded. Table S5 lists the complete set of EMU reactions for the TCA cycle sub-network in order of decreasing EMU size. The first entry in Table S5 shows the EMU reaction forming CIT123456, which is the largest possible EMU of citrate with  $^{13}\text{C}$  labels on each of the metabolite's 6 carbon atoms. The

EMUs needed to form CIT123456 are OAA1234 and AcCoA12. The next group of reactions involves EMUs that either form OAA1234 or one of its precursors, e.g. MAL1234. Note that OAA1234 and MAL1234 have the same size. The last entry of Table S5 shows the EMU reaction forming AcCoA1 from PYR2.

Following the decomposition analysis, which is performed once, the EMU reactions are grouped into decoupled sub-networks according to the size of the product EMU. Isotopomer balances are then written for each subnetwork relating the steady-state reaction fluxes to the MIDs of the corresponding EMUs. In the TCA cycle model, CIT123456 is formed from OAA1234 and AcCoA12 via reaction 3 and further metabolized via reaction 4:

$$v_3 \cdot (\text{OAA1234} \times \text{AcCoA12}) - v_4 \cdot \text{CIT123456} = 0 \quad (\text{S2})$$

Similarly, OAA1234 is related to the EMUs of PYR, CO<sub>2</sub> and MAL:

$$v_2 \cdot (\text{PYR123} \times \text{CO}_2) + v_9 \cdot \text{MAL1234} - v_3 \cdot \text{OAA1234} = 0 \quad (\text{S3})$$

The last equations written are balances involving PYR2 and AcCoA1, which are the smallest EMUs (size 1):

$$v_1 \cdot \text{PYR2} - v_2 \cdot \text{AcCoA1} = 0 \quad (\text{S4})$$

The operator ‘×’ in equations S2 and S3 is the Cauchy product; e.g. the MID of CIT123456 in equation S2 is the convolution of MID of OAA1234 and MID of AcCoA12. For the adipocyte model of this study, the total number of linear EMU balances was 243. The corresponding full isotopomer model would have required 1381 non-linear equations. The EMU isotopomer equations are combined with the stoichiometric balances (equation S1) as equality constraints to solve for a flux distribution that minimizes the sum-squared difference between the calculated and measured flux and MID values. This is a non-linear optimization problem with the following objective function:

$$\text{Min.: } (\mathbf{v}_{\text{meas}} - \mathbf{v}_{\text{sim}})^T (\mathbf{v}_{\text{meas}} - \mathbf{v}_{\text{sim}}) + (\mathbf{MID}_{\text{meas}} - \mathbf{MID}_{\text{sim}})^T (\mathbf{MID}_{\text{meas}} - \mathbf{MID}_{\text{sim}}) \quad (\text{S5})$$

In equation S5,  $\mathbf{v}_{\text{meas}}$  and  $\mathbf{v}_{\text{sim}}$  refer to the vector of measured and calculated exchange fluxes and  $\mathbf{MID}_{\text{meas}}$  and  $\mathbf{MID}_{\text{sim}}$  refer to the matrix of measured and simulated MIDs of selected intracellular metabolites.

### **Input Label**

A series of preliminary simulations were performed to select an appropriate labeling input substrate. The ideal input leads to high  $^{13}\text{C}$  enrichment of intracellular metabolites and generates MIDs that are sensitive to different metabolic flux distributions. We selected glucose as the input substrate, because it is the major carbon source of cultured adipocytes and is quantitatively converted to major intermediates of both carbohydrate and lipid metabolism. We tested the following glucose isotopomers:  $[1\text{-}^{13}\text{C}]$ glucose,  $[1,2\text{-}^{13}\text{C}]$ glucose and  $[\text{U-}^{13}\text{C}]$ glucose. A fourth test case was a 50:50 mixture of  $[1,2\text{-}^{13}\text{C}]$ glucose and  $[\text{U-}^{13}\text{C}]$ glucose. In every case, it was assumed that all of the glucose in the culture medium was labeled (100% enrichment). We used the following scheme to evaluate the four isotopomers as inputs. First, a previously published reaction flux data set (Si, et al., 2007) was used to calculate a corresponding steady-state MID for citrate and glyceraldehyde 3-phosphate (GAP) (see next section for selection of target metabolites). This test flux data set was calculated from measured metabolite input and output rates for an adipocyte metabolic network model that is identical to the model of this study. Next, we solved the EMU-based flux optimization problem (equation S5) for each of the four cases with the calculated MIDs of citrate and GAP as “measurements.” Finally, the flux distributions from the optimization problem were compared to the test flux data set. These comparisons showed the best accuracy (smallest fractional errors) for  $[1,2\text{-}^{13}\text{C}]$ glucose (Figure S2).

### **Target Metabolites for MID Analysis**

For a given input, the accuracy of EMU-based flux estimation generally improved when the number of target metabolites was increased from one to three. Using MIDs of three metabolites (e.g. GAP/phosphoenolpyruvate (PEP)/MAL or GAP/PYR/OAA), it was possible to obtain flux estimates with less than 5.1% maximal error (Figure S3, panels C and D). On the other hand, the gain in accuracy was relatively small compared to the flux estimates obtained using MIDs of two metabolites. For example, the maximal errors were 5.1% and 5.3%, respectively, with MAL/CIT and GAP/CIT (Figure S3, panels A and B). In this study, we measured the MIDs of MAL/CIT, because MAL and CIT were more robustly detected than GAP by our extraction and LC-MS protocols.

**Table S1.** Reaction stoichiometry of the model adipocyte network

| <b>RXN</b> | <b>Pathway</b>                    | <b>Stoichiometry</b>                                                                                                                                                                     |
|------------|-----------------------------------|------------------------------------------------------------------------------------------------------------------------------------------------------------------------------------------|
| 1          | Glycolysis                        | <b>Glucose</b> + ATP = Glucose 6-P + ADP                                                                                                                                                 |
| 2          | Glycolysis                        | Glucose 6-P = Fructose 6-P                                                                                                                                                               |
| 3          | Glycolysis                        | Fructose 6-P + ATP = Glyceraldehyde 3-P + Glycerone-P + ADP                                                                                                                              |
| 4          | Glycolysis                        | Glycerone-P = Glyceraldehyde 3-P                                                                                                                                                         |
| 5          | Glycolysis                        | Glyceraldehyde 3-P + NAD <sup>+</sup> + ADP + Pi = P-Enolpyruvate + ATP + H <sub>2</sub> O                                                                                               |
| 6          | Glycolysis                        | P-Enolpyruvate + ADP + H <sup>+</sup> = Pyruvate + ATP                                                                                                                                   |
| 7          | Glycolysis                        | Pyruvate + NADH + H <sup>+</sup> = <b>Lactate</b> + NAD <sup>+</sup>                                                                                                                     |
| 8          | Pentose phosphate pathway         | Glucose 6-P + 2 NADP <sup>+</sup> + H <sub>2</sub> O = Ribulose 5-P + CO <sub>2</sub> + 2 NADPH + 2 H <sup>+</sup>                                                                       |
| 9          | Pentose phosphate pathway         | 3 Ribulose 5-P = 2 Fructose 6-P + Glyceraldehyde 3-P                                                                                                                                     |
| 10         | TCA cycle (mitochondria)          | <b>Pyruvate</b> + <b>Oxaloacetate</b> + NAD <sup>+</sup> + H <sub>2</sub> O = <b>Citrate</b> + CO <sub>2</sub> + NADH + H <sup>+</sup>                                                   |
| 11         | TCA cycle (mitochondria)          | <b>Pyruvate</b> + HCO <sub>3</sub> <sup>-</sup> + ATP = <b>Oxaloacetate</b> + ADP + Pi                                                                                                   |
| 12         | TCA cycle (mitochondria)          | <b>Citrate</b> + NAD <sup>+</sup> = <b>2-Oxoglutarate</b> + CO <sub>2</sub> + NADH + H <sup>+</sup>                                                                                      |
| 13         | TCA cycle (mitochondria)          | <b>2-Oxoglutarate</b> + NAD <sup>+</sup> + CoA = <b>Succinyl-CoA</b> + CO <sub>2</sub> + NADH                                                                                            |
| 14         | TCA cycle (mitochondria)          | <b>Succinyl-CoA</b> + FAD + Pi + ADP = <b>Fumarate</b> + FADH <sub>2</sub> + ATP + CoA                                                                                                   |
| 15         | TCA cycle (mitochondria)          | <b>Fumarate</b> + H <sub>2</sub> O = <b>Malate</b>                                                                                                                                       |
| 16         | TCA cycle (mitochondria)          | <b>Malate</b> + NAD <sup>+</sup> = <b>Oxaloacetate</b> + NADH + H <sup>+</sup>                                                                                                           |
| 17         | TCA cycle                         | Citrate + CoA + ATP = Acetyl-CoA + Oxaloacetate + ADP + Pi                                                                                                                               |
| 18         | TCA cycle                         | Oxaloacetate + NADH + H <sup>+</sup> = Malate + NAD <sup>+</sup>                                                                                                                         |
| 19         | TCA cycle                         | Malate + NADP <sup>+</sup> = Pyruvate + CO <sub>2</sub> + NADPH                                                                                                                          |
| 20         | TCA cycle                         | Citrate + NADP <sup>+</sup> = 2-Oxoglutarate + CO <sub>2</sub> + NADPH + H <sup>+</sup>                                                                                                  |
| 21         | TCA cycle                         | Oxaloacetate + ATP = P-Enolpyruvate + CO <sub>2</sub> + ADP                                                                                                                              |
| 22         | Oxidative phosphorylation         | NADH + 0.5 O <sub>2</sub> + 3 ADP + 3 Pi + 4 H <sup>+</sup> = NAD <sup>+</sup> + 3 ATP + 4 H <sub>2</sub> O                                                                              |
| 23         | Oxidative phosphorylation         | FADH <sub>2</sub> + 0.5 O <sub>2</sub> + 2 ADP + 2 Pi + 3 H <sup>+</sup> = FAD + 2 ATP + 3 H <sub>2</sub> O                                                                              |
| 24         | Palmitate biosynthesis            | 8 Acetyl-CoA + 14 NADPH + 7 ATP + 7 HCO <sub>3</sub> <sup>-</sup> + 14 H <sup>+</sup> = Palmitate + 14 NADP <sup>+</sup> + 8 CoA + 7 ADP + 7 Pi + 7 CO <sub>2</sub> + 6 H <sub>2</sub> O |
| 25         | Tripalmitoylglycerol accumulation | Tripalmitoylglycerol = <b>Tripalmitoylglycerol</b>                                                                                                                                       |
| 26         | Tripalmitoylglycerol biosynthesis | Glycerone-P + 3 Palmitate + NADH + 3 ATP + H <sub>2</sub> O + H <sup>+</sup> = Tripalmitoylglycerol + NAD <sup>+</sup> + Pi + 3 AMP + 3 PPi                                              |
| 27         | Tripalmitoylglycerol biosynthesis | Tripalmitoylglycerol + 3 H <sub>2</sub> O = <b>Glycerol</b> + 3 Palmitate                                                                                                                |
| 28         | Metabolism of ketone bodies       | 2 <b>Acetyl-CoA</b> = <b>Acetoacetate</b> + 2 CoA                                                                                                                                        |
| 29         | Metabolism of ketone bodies       | <b>Acetoacetyl-CoA</b> = <b>Acetoacetate</b> + CoA                                                                                                                                       |
| 30         | Metabolism of ketone bodies       | <b>Acetoacetate</b> + NADH = <b>3-Hydroxybutyrate</b>                                                                                                                                    |
| 31         | Amino acid metabolism             | Pyruvate + NH <sub>4</sub> <sup>+</sup> + NADPH = Alanine                                                                                                                                |
| 32         | Amino acid metabolism             | Aspartate + NH <sub>4</sub> <sup>+</sup> = <b>Asparagine</b>                                                                                                                             |
| 33         | Amino acid metabolism             | Aspartate = Oxaloacetate + NH <sub>4</sub> <sup>+</sup> + NADH                                                                                                                           |
| 34         | Amino acid metabolism             | Cysteine = Pyruvate + NH <sub>4</sub> <sup>+</sup> + NADH                                                                                                                                |
| 35         | Amino acid metabolism             | Glutamate = 2-Oxoglutarate + NH <sub>4</sub> <sup>+</sup> + NADH                                                                                                                         |

|    |                        |                                                                                                                                                    |
|----|------------------------|----------------------------------------------------------------------------------------------------------------------------------------------------|
| 36 | Amino acid metabolism  | Glutamate + NH <sub>4</sub> <sup>+</sup> + ATP = <b>Glutamine</b>                                                                                  |
| 37 | Amino acid metabolism  | Serine + THF = Glycine                                                                                                                             |
| 38 | Amino acid metabolism  | <b>Histidine</b> + THF = Glutamate + NH <sub>4</sub> <sup>+</sup>                                                                                  |
| 39 | Amino acid metabolism  | <b>Isoleucine</b> + 2 CoA = <i>Succinyl-CoA</i> + <i>Acetyl-CoA</i> + NH <sub>4</sub> <sup>+</sup> + FADH <sub>2</sub> + 2 NADH                    |
| 40 | Amino acid metabolism  | <b>Leucine</b> + CoA + CO <sub>2</sub> + ATP = <i>Acetoacetate</i> + <i>Acetyl-CoA</i> + NH <sub>4</sub> <sup>+</sup> + FADH <sub>2</sub> + 2 NADH |
| 41 | Amino acid metabolism  | <b>Lysine</b> = 2-Oxoadipate + 2 NH <sub>4</sub> <sup>+</sup> + 3 NADH                                                                             |
| 42 | Amino acid metabolism  | 2-Oxoadipate + CoA = <i>Acetoacetyl-CoA</i> + 2 CO <sub>2</sub> + FADH <sub>2</sub> + 2 NADH                                                       |
| 43 | Amino acid metabolism  | <b>Methionine</b> + Serine + ATP + CoA + THF = <i>Succinyl-CoA</i> + Cysteine + NH <sub>4</sub> <sup>+</sup> + NADH                                |
| 44 | Amino acid metabolism  | <b>Phenylalanine</b> + O <sub>2</sub> + NADH = Tyrosine                                                                                            |
| 45 | Amino acid metabolism  | Glutamate + ATP + 2 NADPH = <b>Proline</b>                                                                                                         |
| 46 | Amino acid metabolism  | Serine = Pyruvate + NH <sub>4</sub> <sup>+</sup>                                                                                                   |
| 47 | Amino acid metabolism  | <b>Threonine</b> + CoA = Glycine + <i>Acetyl-CoA</i> + NADH                                                                                        |
| 48 | Amino acid metabolism  | <b>Tryptophan</b> + 3 O <sub>2</sub> + NADPH = 2-Oxoadipate + Alanine + CO <sub>2</sub> + NH <sub>4</sub> <sup>+</sup>                             |
| 49 | Amino acid metabolism  | Tyrosine + 2 O <sub>2</sub> = <i>Acetoacetate</i> + <i>Fumarate</i> + CO <sub>2</sub> + NH <sub>4</sub> <sup>+</sup> + NADH                        |
| 50 | Amino acid metabolism  | <b>Valine</b> + CoA = <i>Succinyl-CoA</i> + CO <sub>2</sub> + 4 NADH + FADH <sub>2</sub> + NH <sub>4</sub> <sup>+</sup>                            |
| 51 | Plasma exchange        | Palmitate = <b>Palmitate</b>                                                                                                                       |
| 52 | Plasma exchange        | <i>Acetoacetate</i> = <b>Acetoacetate</b>                                                                                                          |
| 53 | Plasma exchange        | Alanine = <b>Alanine</b>                                                                                                                           |
| 54 | Plasma exchange        | <b>Aspartate</b> = Aspartate                                                                                                                       |
| 55 | Plasma exchange        | <b>Cysteine</b> = Cysteine                                                                                                                         |
| 56 | Plasma exchange        | <b>Glutamate</b> = Glutamate                                                                                                                       |
| 57 | Plasma exchange        | Glycine = <b>Glycine</b>                                                                                                                           |
| 58 | Plasma exchange        | <b>Serine</b> = Serine                                                                                                                             |
| 59 | Plasma exchange        | <b>Tyrosine</b> = Tyrosine                                                                                                                         |
| 60 | Plasma exchange        | <b>O<sub>2</sub></b> = O <sub>2</sub>                                                                                                              |
| 61 | Plasma exchange        | <b>CO<sub>2</sub></b> = CO <sub>2</sub>                                                                                                            |
| 62 | Plasma exchange        | NH <sub>4</sub> <sup>+</sup> = <b>NH<sub>4</sub><sup>+</sup></b>                                                                                   |
| 63 | Mitochondrial exchange | Pyruvate = <i>Pyruvate</i>                                                                                                                         |
| 64 | Mitochondrial exchange | <i>Citrate</i> + Malate = Citrate + <i>Malate</i>                                                                                                  |
| 65 | Mitochondrial exchange | 2-Oxoglutarate + <i>Malate</i> = <i>2-Oxoglutarate</i> + Malate                                                                                    |
| 66 | Mitochondrial exchange | <i>Malate</i> + Pi = Malate + <b>Pi</b>                                                                                                            |

Extracellular metabolites are indicated in bold. Mitochondrial metabolites are indicated in bold italics. Several entries in the table (e.g. reaction #10) represent pseudo-reactions obtained by condensing sequences of non-branching reactions.

**Table S2.** Amino acid uptake or output on day 12 post-induction

| <b>Amino Acid</b> | <b>Control</b> | <b>20 mM OXA</b> | <b>5 mM PA</b> | <b>10 mM PA</b> |
|-------------------|----------------|------------------|----------------|-----------------|
| ALA               | 0.7 ± 0.0      | 0.6 ± 0.0 *      | 0.4 ± 0.1 *    | -0.5 ± 0.1 *    |
| ASN               | -3.0 ± 0.1     | -1.1 ± 0.2 *     | -4.6 ± 0.2 *   | -5.9 ± 0.4 *    |
| ASP               | 0.0 ± 0.0      | 0.0 ± 0.0        | 0.0 ± 0.0      | 0.0 ± 0.0       |
| GLN               | -11.2 ± 1.4    | -12.0 ± 1.5      | -7.9 ± 0.6 *   | 2.6 ± 2.9 *     |
| GLU               | 0.4 ± 0.0      | 0.4 ± 0.0 *      | 0.3 ± 0.0 *    | 0.3 ± 0.0 *     |
| GLY               | -8.8 ± 0.4     | -5.9 ± 0.4 *     | -7.3 ± 0.2 *   | -7.9 ± 0.9      |
| HIS               | -0.4 ± 0.1     | -0.2 ± 0.1 *     | -0.1 ± 0.1 *   | -0.1 ± 0.2 *    |
| ILE               | 8.2 ± 0.2      | 6.1 ± 0.3 *      | 8.1 ± 0.3      | 7.5 ± 0.2 *     |
| LEU               | 8.8 ± 0.2      | 6.8 ± 0.3 *      | 8.6 ± 0.3      | 7.9 ± 0.2 *     |
| LYS               | 0.3 ± 0.5      | -2.0 ± 0.3 *     | -1.8 ± 0.1 *   | -2.0 ± 0.2 *    |
| MET               | 0.1 ± 0.1      | 0.0 ± 0.0        | 0.1 ± 0.1      | 0.1 ± 0.2       |
| PHE               | -0.8 ± 0.1     | -0.3 ± 0.1 *     | -0.1 ± 0.1 *   | -0.1 ± 0.4 *    |
| PRO               | -0.4 ± 0.1     | -0.5 ± 0.0       | -1.4 ± 0.0 *   | -2.1 ± 0.2 *    |
| SER               | 4.1 ± 0.1      | 4.0 ± 0.2        | 4.5 ± 0.2 *    | 4.6 ± 0.5       |
| THR               | -1.0 ± 0.3     | -1.4 ± 0.3       | -1.2 ± 0.1     | -1.4 ± 0.4      |
| TYR               | -0.7 ± 0.1     | -0.3 ± 0.1 *     | 0.1 ± 0.2 *    | -0.0 ± 0.4 *    |
| VAL               | 5.5 ± 0.2      | 3.3 ± 0.2 *      | 5.1 ± 0.4      | 3.8 ± 0.4 *     |

All units are in mmol/g-DNA/2 days. Data shown are means ± SD ( $n = 6$ ). \*: statistically significantly different from control ( $p < 0.05$ ). Positive value indicates uptake.

**Table S3.** Metabolic flux profiles on day 12 post-induction

| <b>RXN</b> | <b>Control</b> |         | <b>OXA 20 mM</b> |         |   | <b>PA 5 mM</b> |         |   | <b>PA 10 mM</b> |        |   |
|------------|----------------|---------|------------------|---------|---|----------------|---------|---|-----------------|--------|---|
| 1          | 266.0          | ± 16.2  | 212.3            | ± 15.3  | * | 367.0          | ± 17.6  | * | 341.0           | ± 14.4 | * |
| 2          | 225.3          | ± 12.9  | 205.0            | ± 14.2  | * | 359.9          | ± 23.3  | * | 316.7           | ± 19.4 | * |
| 3          | 252.4          | ± 13.4  | 209.9            | ± 14.8  | * | 364.7          | ± 19.3  | * | 332.9           | ± 13.7 | * |
| 4          | 239.0          | ± 12.8  | 187.8            | ± 13.9  | * | 342.7          | ± 18.4  | * | 309.4           | ± 13.0 | * |
| 5          | 505.1          | ± 28.5  | 400.1            | ± 28.6  | * | 709.8          | ± 35.8  | * | 650.5           | ± 26.0 | * |
| 6          | 629.4          | ± 47.6  | 463.5            | ± 35.6  | * | 784.6          | ± 35.5  | * | 725.6           | ± 35.8 | * |
| 7          | 200.0          | ± 23.5  | 119.2            | ± 9.1   | * | 410.4          | ± 19.1  | * | 427.8           | ± 9.4  | * |
| 8          | 40.7           | ± 14.9  | 7.3              | ± 4.6   | * | 7.1            | ± 7.8   | * | 24.3            | ± 18.5 |   |
| 9          | 13.6           | ± 5.0   | 2.4              | ± 1.5   | * | 2.4            | ± 2.6   | * | 8.1             | ± 6.2  |   |
| 10         | 318.7          | ± 41.3  | 290.4            | ± 25.6  |   | 312.7          | ± 48.2  |   | 233.7           | ± 25.1 | * |
| 11         | 184.6          | ± 26.1  | 109.1            | ± 31.7  | * | 141.4          | ± 13.2  | * | 123.5           | ± 15.3 | * |
| 12         | 132.2          | ± 32.6  | 185.0            | ± 19.7  | * | 200.9          | ± 54.1  | * | 132.2           | ± 19.3 |   |
| 13         | 194.4          | ± 32.7  | 226.7            | ± 26.2  |   | 237.8          | ± 52.0  |   | 158.6           | ± 26.1 |   |
| 14         | 208.1          | ± 32.6  | 236.0            | ± 26.3  |   | 251.0          | ± 52.6  |   | 169.9           | ± 26.6 |   |
| 15         | 208.1          | ± 32.6  | 236.0            | ± 26.3  |   | 251.2          | ± 52.7  |   | 170.1           | ± 27.0 |   |
| 16         | 134.2          | ± 34.7  | 181.2            | ± 40.8  |   | 171.3          | ± 45.2  |   | 110.2           | ± 17.8 |   |
| 17         | 124.4          | ± 21.8  | 63.7             | ± 12.9  | * | 74.9           | ± 9.0   | * | 75.1            | ± 16.4 | * |
| 18         | 0.1            | ± 0.1   | 0.3              | ± 0.8   |   | 0.0            | ± 0.0   |   | 0.0             | ± 0.0  |   |
| 19         | 74.0           | ± 12.1  | 55.2             | ± 20.8  |   | 79.9           | ± 9.7   |   | 59.9            | ± 9.2  | * |
| 20         | 62.2           | ± 20.0  | 41.6             | ± 9.1   |   | 36.9           | ± 7.3   | * | 26.4            | ± 6.9  | * |
| 21         | 124.3          | ± 21.9  | 63.4             | ± 12.9  | * | 74.8           | ± 9.0   | * | 75.1            | ± 16.4 | * |
| 22         | 607.9          | ± 150.0 | 770.4            | ± 108.2 |   | 527.6          | ± 214.3 |   | 213.9           | ± 89.2 | * |
| 23         | 230.8          | ± 32.6  | 252.2            | ± 26.4  |   | 272.8          | ± 53.3  |   | 189.1           | ± 27.3 | * |
| 24         | 15.5           | ± 2.7   | 8.0              | ± 1.6   | * | 9.4            | ± 1.1   | * | 9.4             | ± 2.0  | * |
| 25         | 13.4           | ± 1.4   | 22.1             | ± 4.8   | * | 22.0           | ± 1.3   | * | 23.5            | ± 3.0  | * |
| 26         | 8.6            | ± 0.8   | 19.8             | ± 4.4   | * | 19.2           | ± 1.4   | * | 20.6            | ± 2.4  | * |
| 27         | 4.8            | ± 0.9   | 2.3              | ± 0.5   | * | 2.8            | ± 0.4   | * | 2.9             | ± 0.6  | * |
| 28         | 8.9            | ± 0.2   | 6.4              | ± 0.3   | * | 8.4            | ± 0.3   | * | 7.8             | ± 0.2  | * |
| 29         | 0.3            | ± 0.4   | 0.0              | ± 0.0   |   | 0.0            | ± 0.0   |   | 0.0             | ± 0.0  |   |
| 30         | 16.5           | ± 1.3   | 10.8             | ± 2.2   | * | 17.0           | ± 0.6   |   | 15.9            | ± 0.7  |   |
| 31         | 0.0            | ± 0.0   | 0.0              | ± 0.0   |   | 0.0            | ± 0.0   |   | 0.5             | ± 0.1  | * |
| 32         | 1.5            | ± 0.1   | 0.6              | ± 0.1   | * | 2.3            | ± 0.1   | * | 2.9             | ± 0.2  | * |
| 33         | 0.0            | ± 0.0   | 0.0              | ± 0.0   |   | 0.0            | ± 0.0   |   | 0.0             | ± 0.0  |   |
| 34         | 0.0            | ± 0.0   | 0.0              | ± 0.0   |   | 0.0            | ± 0.0   |   | 0.0             | ± 0.0  |   |
| 35         | 0.0            | ± 0.0   | 0.0              | ± 0.0   |   | 0.0            | ± 0.0   |   | 0.0             | ± 0.0  | * |
| 36         | 7.5            | ± 0.9   | 8.0              | ± 1.0   |   | 5.3            | ± 0.4   | * | 0.0             | ± 0.0  | * |
| 37         | 6.0            | ± 0.3   | 5.0              | ± 0.3   | * | 5.8            | ± 0.2   |   | 6.2             | ± 0.4  |   |
| 38         | 3.8            | ± 0.5   | 4.1              | ± 0.5   |   | 2.7            | ± 0.2   | * | 0.5             | ± 0.1  | * |
| 39         | 8.2            | ± 0.2   | 6.1              | ± 0.3   | * | 8.1            | ± 0.3   |   | 7.5             | ± 0.2  | * |
| 40         | 8.8            | ± 0.2   | 6.8              | ± 0.3   | * | 8.6            | ± 0.3   |   | 7.9             | ± 0.2  | * |
| 41         | 0.3            | ± 0.4   | 0.0              | ± 0.0   |   | 0.0            | ± 0.0   |   | 0.0             | ± 0.0  |   |
| 42         | 0.3            | ± 0.4   | 0.0              | ± 0.0   |   | 0.0            | ± 0.0   |   | 0.0             | ± 0.0  |   |
| 43         | 0.0            | ± 0.0   | 0.0              | ± 0.0   |   | 0.0            | ± 0.0   |   | 0.0             | ± 0.0  |   |
| 44         | 0.0            | ± 0.0   | 0.0              | ± 0.0   |   | 0.0            | ± 0.0   |   | 0.1             | ± 0.3  |   |
| 45         | 0.0            | ± 0.0   | 0.0              | ± 0.0   | * | 0.0            | ± 0.0   |   | 1.5             | ± 0.1  | * |
| 46         | 0.0            | ± 0.0   | 0.0              | ± 0.0   |   | 0.0            | ± 0.0   |   | 0.0             | ± 0.0  |   |
| 47         | 0.9            | ± 0.1   | 0.0              | ± 0.0   | * | 0.1            | ± 0.1   | * | 0.2             | ± 0.2  | * |



|    |               |              |   |               |   |                |
|----|---------------|--------------|---|---------------|---|----------------|
| 48 | 0.0 ± 0.0     | 0.0 ± 0.0    |   | 0.0 ± 0.0     |   | 0.0 ± 0.0      |
| 49 | 0.0 ± 0.0     | 0.0 ± 0.0    |   | 0.2 ± 0.1     |   | 0.2 ± 0.5      |
| 50 | 5.5 ± 0.2     | 3.3 ± 0.2    | * | 5.1 ± 0.4     |   | 3.8 ± 0.4 *    |
| 51 | 1.1 ± 0.1     | 1.0 ± 0.1    |   | 1.0 ± 0.1     | * | 0.8 ± 0.1 *    |
| 52 | 1.5 ± 1.2     | 2.4 ± 1.9    |   | 0.2 ± 0.2     | * | 0.0 ± 0.1 *    |
| 53 | 0.0 ± 0.0     | 0.0 ± 0.0    |   | 0.0 ± 0.0     |   | 0.5 ± 0.1 *    |
| 54 | 1.5 ± 0.1     | 0.6 ± 0.1    | * | 2.3 ± 0.1     | * | 2.9 ± 0.2 *    |
| 55 | 0.0 ± 0.0     | 0.0 ± 0.0    |   | 0.0 ± 0.0     |   | 0.0 ± 0.0      |
| 56 | 3.6 ± 0.4     | 3.9 ± 0.5    |   | 2.6 ± 0.2     | * | 0.9 ± 0.1 *    |
| 57 | 6.9 ± 0.2     | 5.0 ± 0.3    | * | 5.9 ± 0.2     | * | 6.4 ± 0.4 *    |
| 58 | 6.0 ± 0.3     | 5.0 ± 0.3    | * | 5.8 ± 0.2     |   | 6.2 ± 0.4      |
| 59 | 0.0 ± 0.0     | 0.0 ± 0.0    |   | 0.1 ± 0.1     | * | 0.1 ± 0.2      |
| 60 | 419.3 ± 91.2  | 511.3 ± 67.1 |   | 400.5 ± 134.0 |   | 202.1 ± 59.1 * |
| 61 | 759.2 ± 105.9 | 756.9 ± 75.2 |   | 805.5 ± 145.9 |   | 582.8 ± 66.5 * |
| 62 | 17.9 ± 1.7    | 11.7 ± 0.5   | * | 17.0 ± 1.0    |   | 16.5 ± 1.3     |
| 63 | 503.3 ± 59.8  | 399.5 ± 40.8 | * | 454.0 ± 54.4  |   | 357.2 ± 37.5 * |
| 64 | 186.6 ± 39.0  | 105.3 ± 13.9 | * | 111.7 ± 15.8  | * | 101.5 ± 16.0 * |
| 65 | 62.2 ± 20.0   | 41.6 ± 9.1   |   | 36.9 ± 7.3    | * | 26.4 ± 6.9 *   |
| 66 | 73.9 ± 12.1   | 54.8 ± 20.5  |   | 79.9 ± 9.7    |   | 59.9 ± 9.2     |

All units are in mmol/g-DNA/2 days. Data shown are means ± SD ( $n = 6$ ). \*: statistically significantly different from untreated control ( $p < 0.05$ ). Reaction numbers refer to Supplementary Table 1.

**Table S4.** Comparison of flux estimates from stoichiometric and isotopomer model

| RXN | Control              |        |                     |        | 10 mM PA             |        |                     |        |
|-----|----------------------|--------|---------------------|--------|----------------------|--------|---------------------|--------|
|     | Stoichiometric model |        | Isotopomer analysis |        | Stoichiometric model |        | Isotopomer analysis |        |
| 1   | 100.0                | ± 11.6 | 99.5                | ± 19.9 | 87.9                 | ± 4.8  | 86.3                | ± 6.7  |
| 2   | 71.9                 | ± 14.8 | 74.6                | ± 13.7 | 73.3                 | ± 7.7  | 76.8                | ± 10.8 |
| 3   | 90.6                 | ± 12.6 | 91.2                | ± 17.5 | 83.0                 | ± 4.4  | 83.1                | ± 8.0  |
| 4   | 85.2                 | ± 12.3 | 82.7                | ± 22.1 | 77.1                 | ± 3.7  | 76.3                | ± 5.5  |
| 5   | 185.1                | ± 23.9 | 182.2               | ± 42.0 | 165.0                | ± 7.8  | 162.5               | ± 12.1 |
| 6   | 234.1                | ± 30.8 | 209.8               | ± 60.7 | 175.2                | ± 11.9 | 165.7               | ± 9.5  |
| 7   | 70.1                 | ± 5.5  | 70.3                | ± 9.8  | 129.2                | ± 8.3  | 130.4               | ± 7.3  |
| 8   | 28.1                 | ± 4.1  | 24.9                | ± 9.8  | 14.6                 | ± 8.3  | 9.5                 | ± 4.3  |
| 9   | 9.4                  | ± 1.4  | 8.3                 | ± 3.3  | 4.9                  | ± 2.8  | 3.2                 | ± 1.4  |
| 10  | 121.7                | ± 21.8 | 126.5               | ± 59.5 | 42.8                 | ± 6.3  | 34.2                | ± 5.7  |
| 11  | 69.4                 | ± 15.4 | 105.6               | ± 65.9 | 11.1                 | ± 9.1  | 1.7                 | ± 4.5  |
| 12  | 71.7                 | ± 14.2 | 3.4                 | ± 13.0 | 21.8                 | ± 3.5  | 23.8                | ± 15.1 |
| 13  | 72.7                 | ± 18.7 | 29.8                | ± 7.4  | 26.0                 | ± 3.5  | 25.8                | ± 12.5 |
| 14  | 77.7                 | ± 18.6 | 39.2                | ± 9.2  | 31.7                 | ± 4.0  | 32.5                | ± 8.2  |
| 15  | 77.7                 | ± 18.8 | 39.3                | ± 11.8 | 31.7                 | ± 4.2  | 32.5                | ± 10.2 |
| 16  | 52.4                 | ± 7.5  | 20.9                | ± 15.3 | 31.7                 | ± 3.7  | 32.5                | ± 10.2 |
| 17  | 49.0                 | ± 3.2  | 96.8                | ± 54.7 | 19.4                 | ± 8.9  | 10.2                | ± 10.5 |
| 18  | 0.0                  | ± 0.0  | 71.3                | ± 43.6 | 9.2                  | ± 0.0  | 7.1                 | ± 6.0  |
| 19  | 25.4                 | ± 8.3  | 89.7                | ± 54.8 | 9.2                  | ± 1.5  | 7.1                 | ± 6.0  |
| 20  | 1.1                  | ± 4.4  | 26.4                | ± 17.9 | 1.5                  | ± 0.0  | 0.1                 | ± 0.0  |
| 21  | 49.0                 | ± 7.3  | 27.6                | ± 21.0 | 10.2                 | ± 8.9  | 3.1                 | ± 3.9  |
| 22  | 258.4                | ± 64.0 | 60.6                | ± 12.7 | 0.0                  | ± 0.0  | 0.0                 | ± 0.0  |
| 23  | 85.8                 | ± 18.5 | 50.0                | ± 8.1  | 39.7                 | ± 4.5  | 41.5                | ± 1.9  |
| 24  | 6.1                  | ± 0.4  | 12.1                | ± 6.8  | 2.4                  | ± 1.1  | 1.3                 | ± 1.3  |
| 25  | 2.1                  | ± 0.3  | 4.0                 | ± 5.5  | 0.8                  | ± 0.4  | 0.7                 | ± 0.2  |
| 26  | 5.5                  | ± 0.2  | 8.5                 | ± 6.9  | 5.9                  | ± 1.1  | 6.9                 | ± 3.0  |
| 27  | 3.4                  | ± 0.0  | 4.5                 | ± 0.0  | 5.1                  | ± 0.9  | 6.2                 | ± 3.0  |
| 28  | 3.1                  | ± 0.2  | 3.5                 | ± 1.9  | 3.6                  | ± 0.0  | 4.1                 | ± 0.1  |
| 29  | 0.0                  | ± 0.0  | 0.0                 | ± 0.0  | 0.0                  | ± 0.0  | 0.0                 | ± 0.0  |
| 30  | 4.8                  | ± 0.0  | 5.0                 | ± 6.6  | 4.0                  | ± 1.1  | 4.9                 | ± 1.8  |
| 31  | 0.4                  | ± 0.1  | 0.5                 | ± 2.3  | 3.7                  | ± 0.3  | 7.2                 | ± 1.9  |
| 32  | 0.4                  | ± 0.1  | -0.6                | ± 1.8  | 0.9                  | ± 0.0  | 1.4                 | ± 0.6  |
| 33  | 0.0                  | ± 0.0  | 2.1                 | ± 0.7  | 0.0                  | ± 0.0  | 0.0                 | ± 0.0  |
| 34  | 0.7                  | ± 0.0  | 2.5                 | ± 0.0  | 2.4                  | ± 0.0  | 0.7                 | ± 0.1  |
| 35  | 0.0                  | ± 0.0  | 0.0                 | ± 0.0  | 2.6                  | ± 0.5  | 1.9                 | ± 5.2  |
| 36  | 9.3                  | ± 0.0  | 9.3                 | ± 0.0  | -3.2                 | ± 0.4  | -3.3                | ± 0.8  |
| 37  | 0.7                  | ± 0.3  | 0.3                 | ± 0.7  | 2.2                  | ± 0.0  | 1.1                 | ± 0.1  |
| 38  | 4.8                  | ± 0.1  | 4.8                 | ± 1.4  | 0.0                  | ± 0.2  | 0.0                 | ± 1.9  |

|    |              |              |             |             |
|----|--------------|--------------|-------------|-------------|
| 39 | 3.1 ± 0.1    | 4.1 ± 1.7    | 3.6 ± 0.2   | 3.8 ± 1.3   |
| 40 | 3.1 ± 0.1    | 2.9 ± 3.9    | 2.4 ± 0.2   | 3.2 ± 0.2   |
| 41 | -0.2 ± 0.2   | -0.2 ± 1.9   | -0.1 ± 0.3  | 1.8 ± 5.4   |
| 42 | 0.0 ± 0.0    | 0.0 ± 1.1    | 0.0 ± 0.4   | 0.0 ± 0.0   |
| 43 | 0.0 ± 0.0    | 1.6 ± 1.4    | 0.1 ± 0.1   | 0.8 ± 0.6   |
| 44 | -0.3 ± 0.1   | -0.3 ± 0.2   | -0.3 ± 0.2  | -0.7 ± 1.4  |
| 45 | -1.9 ± 0.0   | -2.0 ± 0.0   | 1.0 ± 0.2   | 1.5 ± 2.6   |
| 46 | 1.4 ± 0.2    | 0.9 ± 0.3    | 0.0 ± 0.0   | 0.0 ± 0.0   |
| 47 | 0.1 ± 0.0    | 0.0 ± 1.9    | 1.2 ± 0.2   | 1.1 ± 1.1   |
| 48 | 0.2 ± 0.2    | 0.2 ± 0.3    | 0.1 ± 0.2   | -1.8 ± 0.7  |
| 49 | 0.0 ± 0.0    | 0.1 ± 1.0    | 0.0 ± 0.4   | 0.0 ± 0.0   |
| 50 | 1.9 ± 0.1    | 3.7 ± 2.8    | 1.9 ± 0.6   | 2.1 ± 3.7   |
| 51 | -0.1 ± 0.3   | 0.2 ± 0.6    | -0.1 ± 0.1  | -0.8 ± 1.4  |
| 52 | 1.3 ± 0.0    | 1.5 ± 4.7    | 2.0 ± 0.3   | 2.3 ± 1.9   |
| 53 | 0.7 ± 0.0    | 0.7 ± 0.5    | 3.8 ± 0.2   | 5.4 ± 1.4   |
| 54 | 0.4 ± 0.0    | 1.5 ± 0.4    | 0.9 ± 0.0   | 1.4 ± 0.3   |
| 55 | 0.0 ± 0.0    | 0.6 ± 0.5    | 0.0 ± 0.1   | -1.1 ± 0.5  |
| 56 | 2.6 ± 0.2    | 2.5 ± 0.3    | 0.5 ± 0.2   | 0.1 ± 0.6   |
| 57 | 0.1 ± 0.0    | 0.0 ± 0.0    | 1.2 ± 0.2   | 1.1 ± 1.1   |
| 58 | 2.1 ± 0.1    | 2.8 ± 1.9    | 2.4 ± 0.1   | 1.8 ± 0.6   |
| 59 | 0.3 ± 41.7   | 0.4 ± 22.2   | 0.3 ± 0.2   | 0.7 ± 0.8   |
| 60 | 172.5 ± 56.0 | 55.7 ± 87.0  | 19.8 ± 3.2  | 14.6 ± 6.5  |
| 61 | 299.3 ± 0.0  | 223.7 ± 2.2  | 114.6 ± 6.7 | 99.0 ± 14.3 |
| 62 | 4.5 ± 37.0   | 13.5 ± 124.6 | 11.7 ± 2.5  | 9.0 ± 17.0  |
| 63 | 191.1 ± 7.5  | 232.1 ± 72.2 | 53.8 ± 15.2 | 35.9 ± 1.6  |
| 64 | 50.1 ± 4.4   | 123.2 ± 17.9 | 21.0 ± 8.9  | 10.3 ± 10.3 |
| 65 | 1.1 ± 12.7   | 26.4 ± 23.9  | 4.2 ± 0.5   | 2.0 ± 5.5   |
| 66 | 25.4 ± 0.1   | 18.4 ± 1.4   | 0.0 ± 0.0   | 0.0 ± 0.0   |

Flux estimates reflect metabolite and isotopomer data collected for a separate batch of cells on day 12 post-induction. Data were normalized to the glucose uptake rate (RXN #1) of the untreated control condition (100 %). Data shown are means ± SD ( $n = 3$ ). Reaction numbers refer to Table S1.

**Table S5.** EMU reactions of the TCA cycle

| <b>Reaction No.</b> | <b>EMU reaction</b>           | <b>EMU size</b> |
|---------------------|-------------------------------|-----------------|
| 3                   | OAA1234 + AcCoA12 = CIT123456 | 6               |
| 8                   | FUM1234 = MAL1234             | 4               |
| 7                   | SUC1234 = FUM1234             | 4               |
| 6                   | SucCoA1234 = SUC1234          | 4               |
| 5                   | aKG2345 = SucCoA1234          | 4               |
| 4                   | CIT2345 = aKG2345             | 4               |
| 3                   | OAA23 + AcCoA12 = CIT2345     | 4               |
| 9                   | MAL1234 = OAA1234             | 4               |
| 2                   | PYR123 + CO21 = OAA1234       | 4               |
| 9                   | MAL23 = OAA23                 | 2               |
| 2                   | PYR23 = OAA23                 | 2               |
| 8                   | FUM23 = MAL23                 | 2               |
| 7                   | SUC23 = FUM23                 | 2               |
| 6                   | SucCoA23 = SUC23              | 2               |
| 5                   | aKG34 = SucCoA23              | 2               |
| 4                   | CIT34 = aKG34                 | 2               |
| 3                   | OAA2 + AcCoA2 = CIT34         | 2               |
| 1                   | PYR3 = AcCoA2                 | 1               |
| 2                   | PYR2 = OAA2                   | 1               |
| 9                   | MAL2= OAA2                    | 1               |
| 8                   | FUM2 = MAL2                   | 1               |
| 7                   | SUC2 = FUM2                   | 1               |
| 6                   | SucCoA2 = SUC2                | 1               |
| 6                   | SucCoA3 = SUC2                | 1               |
| 5                   | aKG3 = SucCoA2                | 1               |
| 5                   | aKG4 = SucCoA3                | 1               |
| 4                   | CIT3 = aKG3                   | 1               |
| 4                   | CIT4 = aKG4                   | 1               |
| 3                   | OAA2 = CIT3                   | 1               |
| 3                   | AcCoA2 = CIT4                 | 1               |
| 1                   | PYR1 = CO21                   | 1               |
| 4                   | CIT6 = CO21                   | 1               |
| 5                   | aKG1 = CO21                   | 1               |
| 3                   | OAA1 = CIT6                   | 1               |
| 2                   | PYR1 = OAA1                   | 1               |
| 9                   | MAL1 = OAA1                   | 1               |
| 8                   | FUM1 = MAL1                   | 1               |
| 7                   | SUC1 = FUM1                   | 1               |
| 6                   | SucCoA1 = SUC1                | 1               |
| 6                   | SucCoA4 = SUC1                | 1               |
| 5                   | aKG2 = SucCoA1                | 1               |
| 5                   | aKG5 = SucCoA4                | 1               |

|   |                |   |
|---|----------------|---|
| 4 | CIT2 = aKG2    | 1 |
| 4 | CIT5 = aKG5    | 1 |
| 4 | CIT1 = aKG1    | 1 |
| 3 | OAA4 = CIT1    | 1 |
| 2 | CO21 = OAA4    | 1 |
| 9 | MAL4 = OAA4    | 1 |
| 8 | FUM4 = MAL4    | 1 |
| 7 | SUC4 = FUM4    | 1 |
| 6 | SucCoA4 = SUC4 | 1 |
| 6 | SucCoA1 = SUC4 | 1 |
| 3 | OAA3 = CIT2    | 1 |
| 2 | PYR3 = OAA3    | 1 |
| 9 | MAL3 = OAA3    | 1 |
| 8 | FUM3 = MAL3    | 1 |
| 7 | SUC3 = FUM3    | 1 |
| 6 | SucCoA2 = SUC3 | 1 |
| 6 | SucCoA3 = SUC3 | 1 |
| 3 | AcCoA1 = CIT5  | 1 |
| 1 | PYR2 = AcCoA1  | 1 |

---

## Supplementary Figures

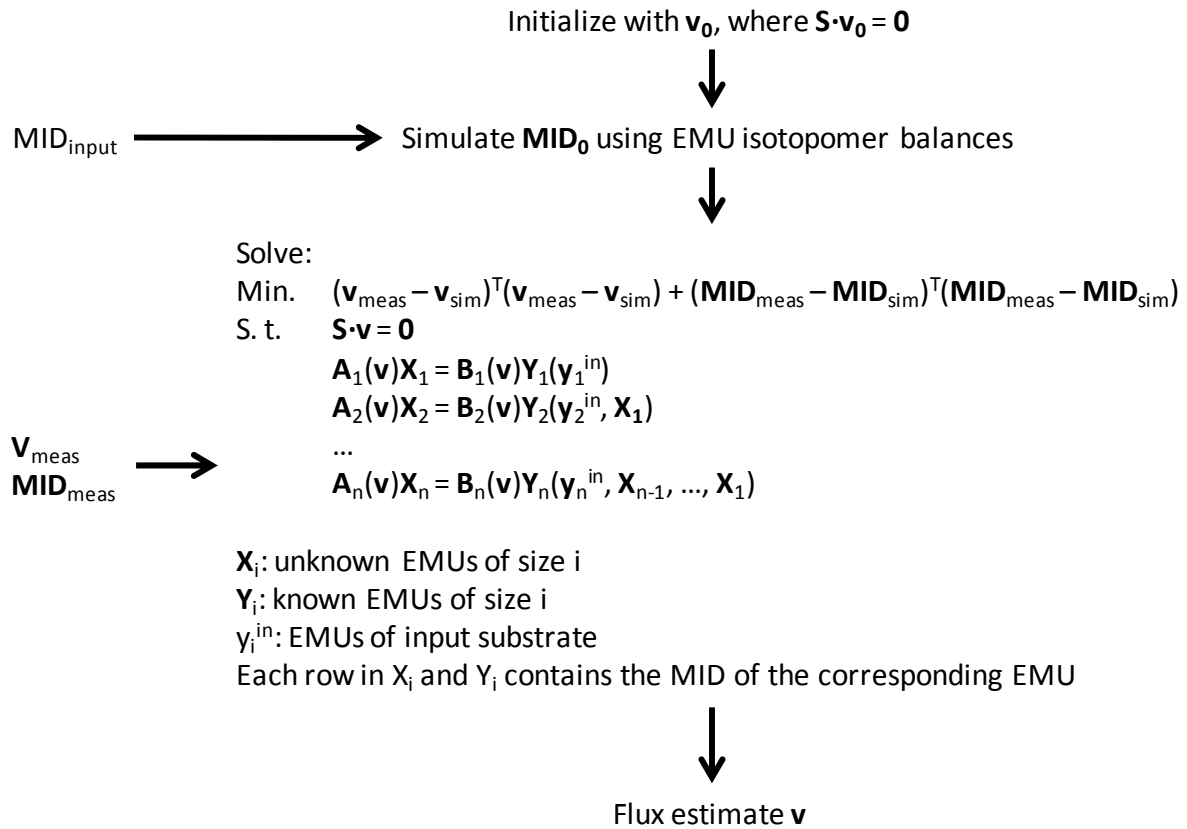

**Figure S1.** Schematic overview of MID-based flux calculation.

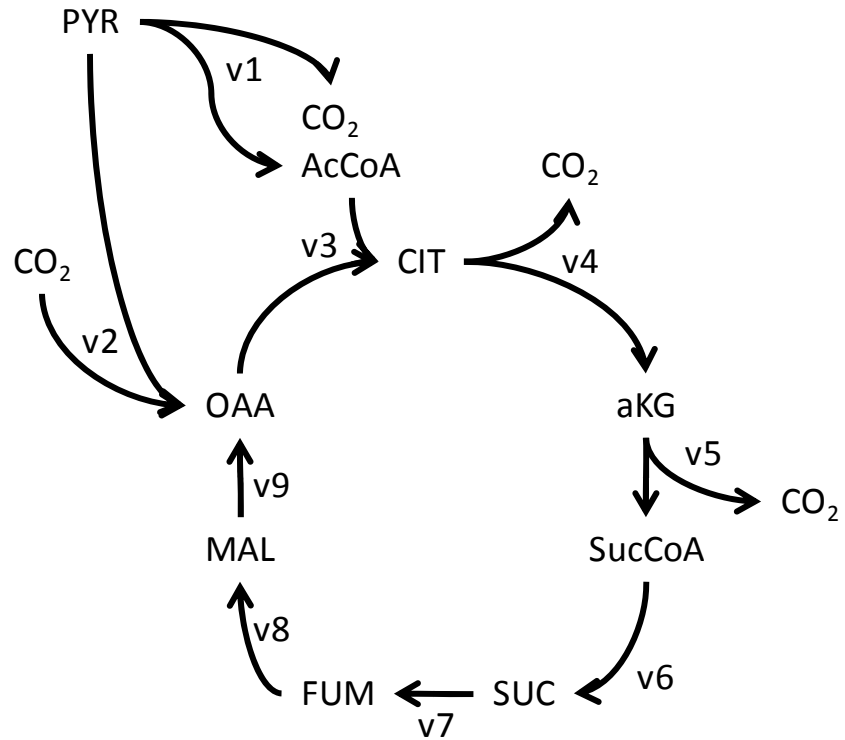

**Figure S2.** Example sub-network around the TCA cycle. PYR: pyruvate; AcCoA: acetyl CoA; OAA: oxaloacetate; CIT: citrate; aKG: 2-oxoglutarate; SucCoA: succinyl-CoA; SUC: succinate; FUM: fumarate; MAL: malate.

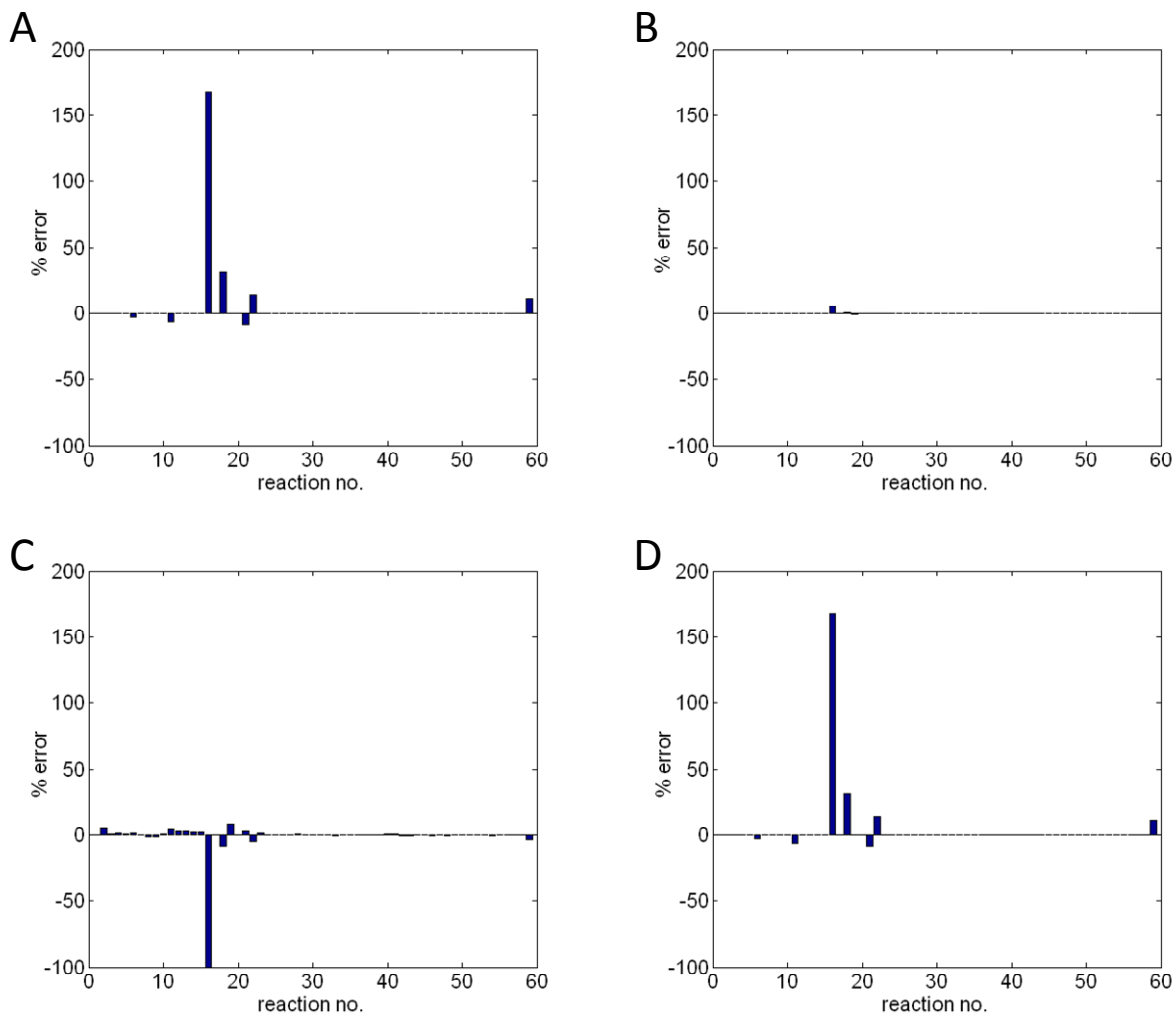

**Figure S3.** Simulations showing the effects of different input label choices on the accuracy of the flux estimates. Panels show the % differences between *a priori* known and MID-based flux estimates. *A priori* known fluxes were taken from a previous publication (see text). (A) [1-<sup>13</sup>C]glucose; (B) [1,2-<sup>13</sup>C]glucose; (C) [U-<sup>13</sup>C]glucose; and (D) 50:50 mixture of [1,2-<sup>13</sup>C]glucose and [U-<sup>13</sup>C]glucose. The flux estimates are based on the simulated MIDs of GAP and CIT.



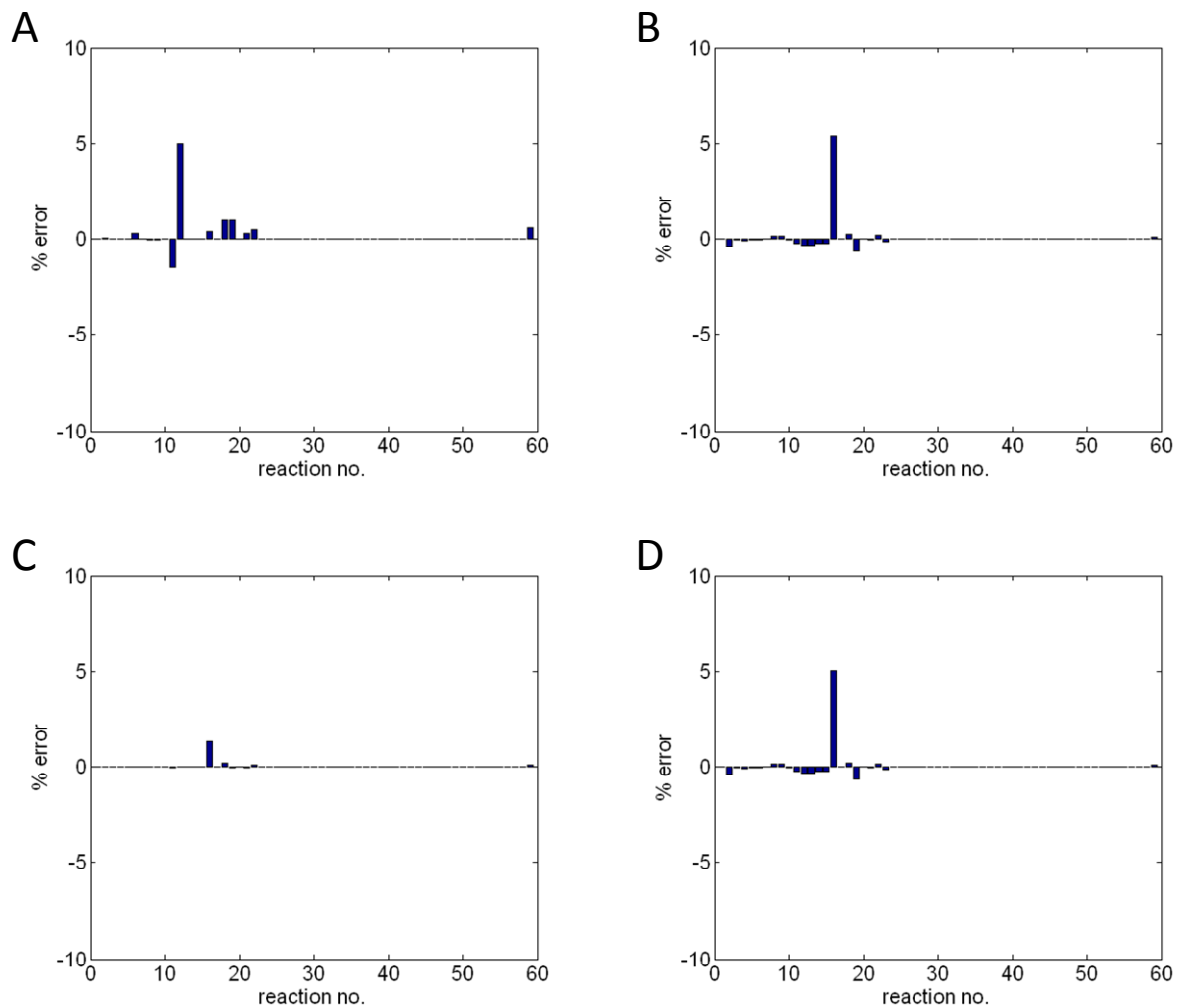

**Figure S4.** Simulations showing the effects of different metabolite MID choices on the accuracy of the flux estimates. Panels show the % differences between *a priori* known and MID-based flux estimates. (A) MAL and CIT; (B) CIT and GAP; (C) GAP, PEP and MAL; (D) GAP, OAA and PYR. All estimates used [1,2-<sup>13</sup>C]glucose as the input label.
